# Supplementary material
Source: PubMed Central journal article supplement (PMC3736753)
Supplement: supp_kwt009_kwt009_Web_Material.pdf [file supp_kwt009_kwt009_Web_Material.pdf]

Web Table 1. Spearman rank correlation coefficients between the four trihalomethanes by study areas. Spanish Bladder Cancer case-control study, Spain 1998-2001.

| Spearman Rank Test correlations |           |            |        |       |
|---------------------------------|-----------|------------|--------|-------|
| <b>Alicante</b> (n=124)         | Total THM | Chloroform | BDCM   | DBCM  |
| Chloroform                      | 0.509     | 1          |        |       |
| BDCM                            | 0.990     | 0.411      | 1      |       |
| DBCM                            | 0.772     | 0.778      | 0.685  | 1     |
| Bromoform                       | 0.912     | 0.202      | 0.952  | 0.503 |
| <b>Asturias</b> (n=616)         | Total THM | Chloroform | BDCM   | DBCM  |
| Chloroform                      | 0.990     | 1          |        |       |
| BDCM                            | 0.972     | 0.966      | 1      |       |
| DBCM                            | 0.316     | 0.257      | 0.315  | 1     |
| Bromoform                       | -0.081    | -0.150     | -0.051 | 0.685 |
| <b>Barcelona</b> (n=255)        | Total THM | Chloroform | BDCM   | DBCM  |
| Chloroform                      | 0.305     | 1          |        |       |
| BDCM                            | 0.971     | 0.416      | 1      |       |
| DBCM                            | 0.981     | 0.201      | 0.933  | 1     |
| Bromoform                       | 0.545     | -0.465     | 0.415  | 0.619 |
| <b>Manresa</b> (n=52)           | Total THM | Chloroform | BDCM   | DBCM  |
| Chloroform                      | 0.885     | 1          |        |       |
| BDCM                            | 0.650     | 0.335      | 1      |       |
| DBCM                            | 0.609     | 0.290      | 0.969  | 1     |
| Bromoform                       | 0.420     | 0.071      | 0.811  | 0.874 |
| <b>Sabadell</b> (n=117)         | Total THM | Chloroform | BDCM   | DBCM  |
| Chloroform                      | 0.888     | 1          |        |       |
| BDCM                            | 0.951     | 0.942      | 1      |       |
| DBCM                            | 0.910     | 0.690      | 0.765  | 1     |
| Bromoform                       | 0.430     | 0.147      | 0.202  | 0.676 |
| <b>Tenerife</b> (n=272)         | Total THM | Chloroform | BDCM   | DBCM  |
| Chloroform                      | 0.911     | 1          |        |       |
| BDCM                            | 0.940     | 0.913      | 1      |       |
| DBCM                            | 0.941     | 0.922      | 0.994  | 1     |
| Bromoform                       | 0.935     | 0.763      | 0.803  | 0.806 |

Abbreviations: TTHM, Total trihalomethanes; BDCM, Bromodichloromethane; DBCM, Dibromochloromethane.

Web Figure 1. Association between total trihalomethane (THM) level and bladder cancer risk adjusted for sex, age, geographic area, high risk profession, smoking status, and fruit and vegetable consumption.

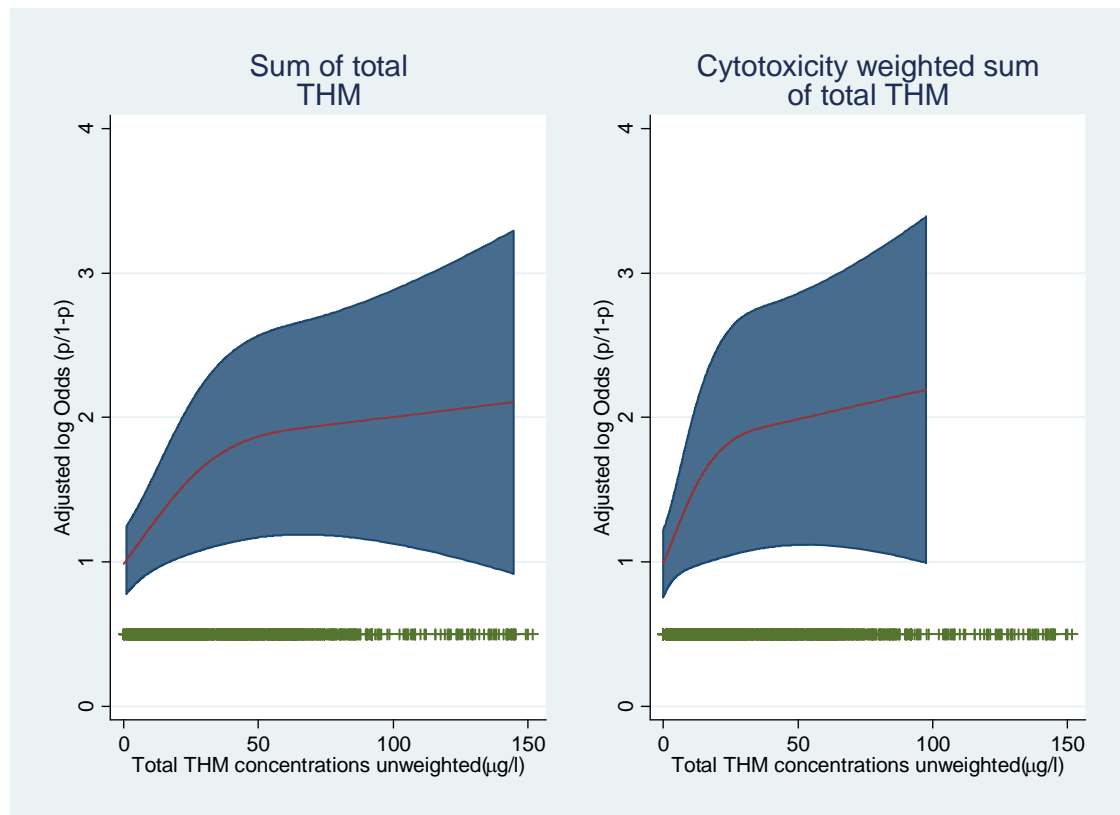

Abbreviations: THM, Trihalomethanes; p, probability; µg/l, micrograms/liter

Note: The lines over the x axis represent observations.

Web Figure 2. Association between lifetime residential trihalomethanes (THM) components and bladder cancer risk adjusted for sex, age, geographic area, high risk profession, smoking status, and fruit and vegetable consumption. Spanish Bladder Cancer Case-Control Study, 1998-2001.

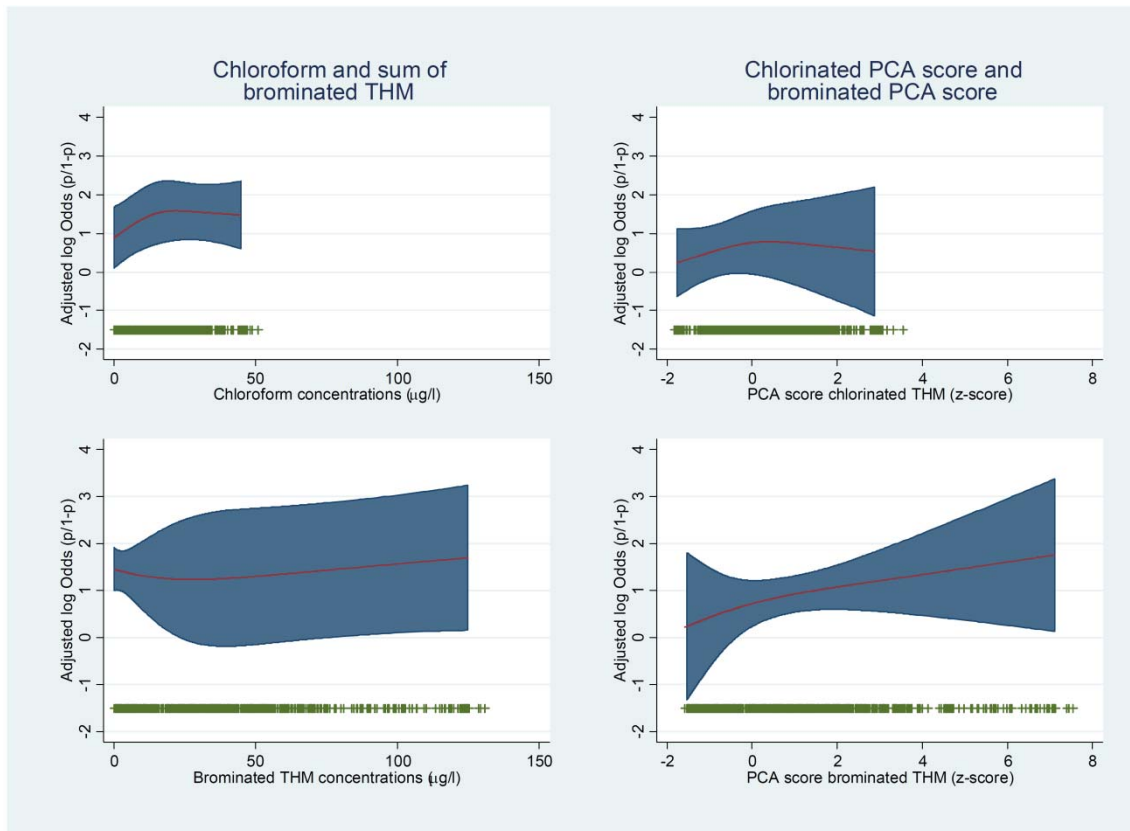

Abbreviations: p, probability; µg/l, micrograms/liter; PCA, principal component analysis; THM, trihalomethanes.

Note: The lines over the x axis represent observations.
